CORRECTION

# Correction: Serum Reactive Oxygen Metabolite Levels Predict Severe Exacerbations of Asthma

The *PLOS ONE* Staff

## Notice of Republication

This article was republished on November 8, 2016, as a Supporting Information file was published in error. The publisher apologizes for the error. Please download this article again to view the correct version.

## Reference

1. Nakamoto K, Watanabe M, Sada M, Inui T, Nakamura M, Honda K, et al. (2016) Serum Reactive Oxygen Metabolite Levels Predict Severe Exacerbations of Asthma. *PLoS ONE* 11(10): e0164948. doi:[10.1371/journal.pone.0164948](https://doi.org/10.1371/journal.pone.0164948) PMID: [27776186](https://pubmed.ncbi.nlm.nih.gov/27776186/)

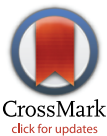

## OPEN ACCESS

**Citation:** The *PLOS ONE* Staff (2016) Correction: Serum Reactive Oxygen Metabolite Levels Predict Severe Exacerbations of Asthma. *PLoS ONE* 11(12): e0168220. doi:[10.1371/journal.pone.0168220](https://doi.org/10.1371/journal.pone.0168220)

**Published:** December 9, 2016

**Copyright:** © 2016 The PLOS ONE Staff. This is an open access article distributed under the terms of the [Creative Commons Attribution License](https://creativecommons.org/licenses/by/4.0/), which permits unrestricted use, distribution, and reproduction in any medium, provided the original author and source are credited.
